# Supplementary material for: Pretreatment of Biogas Slurry by Modified Biochars to Promote High-Value Treatment of Wastewater by Microalgae
Source: MDPI journal article supplement (doi:10.3390/su15043153), 2023-02-09
Supplement: s1 [file s1]

## Supporting Information

# Pretreatment of Biogas Slurry by Modified Biochars to Promote High-Value Treatment of Wastewater by Microalgae

Zhiqiang Gu <sup>1</sup>, Qi Zhang <sup>1</sup>, Guobi Sun <sup>1</sup>, Jiaxin Lu <sup>2,\*</sup>, Yuxin Liu <sup>3</sup>, Zhenxia Huang <sup>3</sup>, Shuming Xu <sup>4</sup>, Jianghua Xiong <sup>5</sup> and Yuhuan Liu <sup>1,\*</sup>

<sup>1</sup> State Key Laboratory of Food Science and Technology, Engineering Research Center for Biomass Conversion, Nanchang University, Ministry of Education, Nanchang 330047, China

<sup>2</sup> Key Laboratory of Cleaner Production and Integrated Resource Utilization of China National Light Industry, Beijing Technology and Business University, Beijing 100048, China

<sup>3</sup> Jiangxi Rural Energy and Environment Agency, Nanchang 330000, China

<sup>4</sup> Dingnan Agricultural and Rural Bureau, Ganzhou 341900, China

<sup>5</sup> Agricultural Ecology and Resources Protection Station of Jiangxi Province, Nanchang 330046, China

\* Correspondence: lujiabin@btbu.edu.cn (J.L.); liuyuhuan@ncu.edu.cn (Y.L.)

**Total page: 4**

**Total # of figures: 2**

## 1 Content

|                                                                                             |    |
|---------------------------------------------------------------------------------------------|----|
| 2 <b>Figure S1.</b> SEM images of the PS300 and PS500-4 (100 $\mu\text{m}$ ).....           | S3 |
| 3 <b>Figure S2.</b> SEM images of the Mg-PS500-2.5 and Mg-PS500-4 (100 $\mu\text{m}$ )..... | S4 |

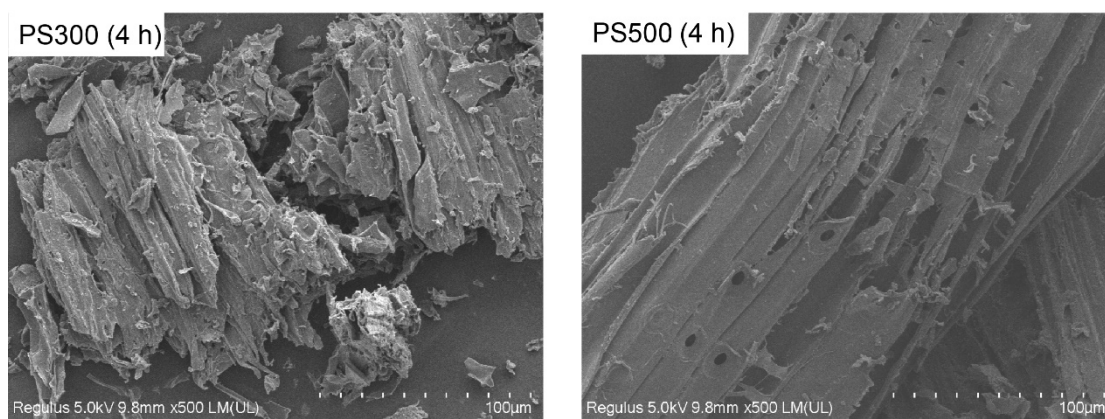

**Figure S1.** SEM images of the PS300 and PS500-4 (100  $\mu\text{m}$ ).

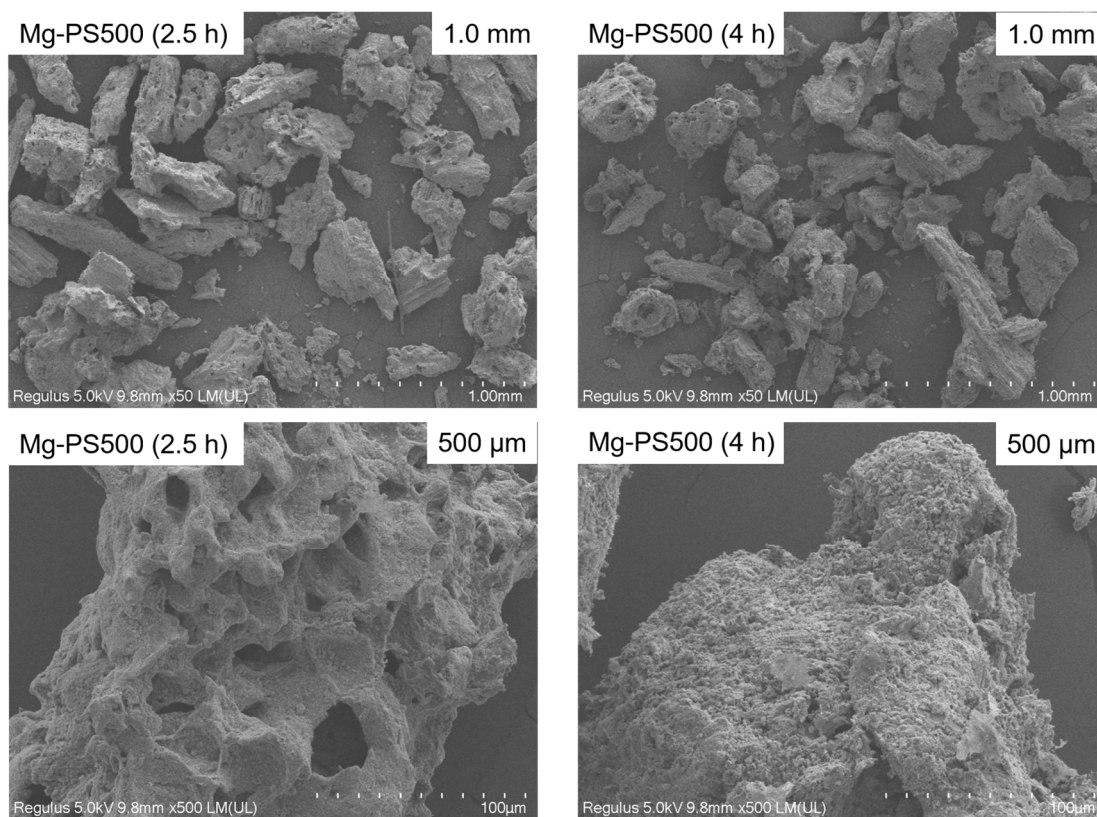

**Figure S2.** SEM images of the Mg-PS500-2.5 and Mg-PS500-4 (100 μm)
